# Supplementary material for: Brain pathology recapitulates physiology: A network meta-analysis
Source: PubMed Central journal article supplement (PMC7940476; doi:10.1038/s42003-021-01832-9), 2021-03-08
Supplement: 42003_2021_1832_MOESM2_ESM.pdf [file 42003_2021_1832_MOESM2_ESM.pdf]

## **Description of Additional Supplementary Files**

**File name:** Supplementary Data 1

**Description:** Data are provided for Figures 1-5.
